# Supplementary material for: Micro-topography influences blood platelet spreading
Source: Royal Society of Chemistry journal article supplement (doi:10.1039/c3sm52636d), 2013-10-23
Supplement: c3sm52636d_2.pdf [file c3sm52636d_2.pdf]

Filename for supporting video: M1-Micro-TopographyInfluencesBloodPlateletSpreading.avi

Short descriptive title: z-stack of a platelet on a completely coated, structured substrate with an array of 3.0  $\mu\text{m}$  wide holes

Video legend: The video shows a z-stack of a platelet stained for actin (in red) on a microstructured substrate with an array of approximately 3.0  $\mu\text{m}$  wide holes. The substrate is coated completely with fibrinogen (in grey). As the z-stack progresses to planes that lie in the holes, lamellipodia are emerging (position marked with circles).

Keywords: microstructured substrates, platelets, lamellipodia, curvature-dependence, cell morphology
